# Supplementary material for: Patterns of Mesenchymal Condensation in a Multiscale, Discrete Stochastic Model
Source: PubMed Central journal article supplement (PMC1857812; doi:10.1371/journal.pcbi.0030076), 2007-04-27

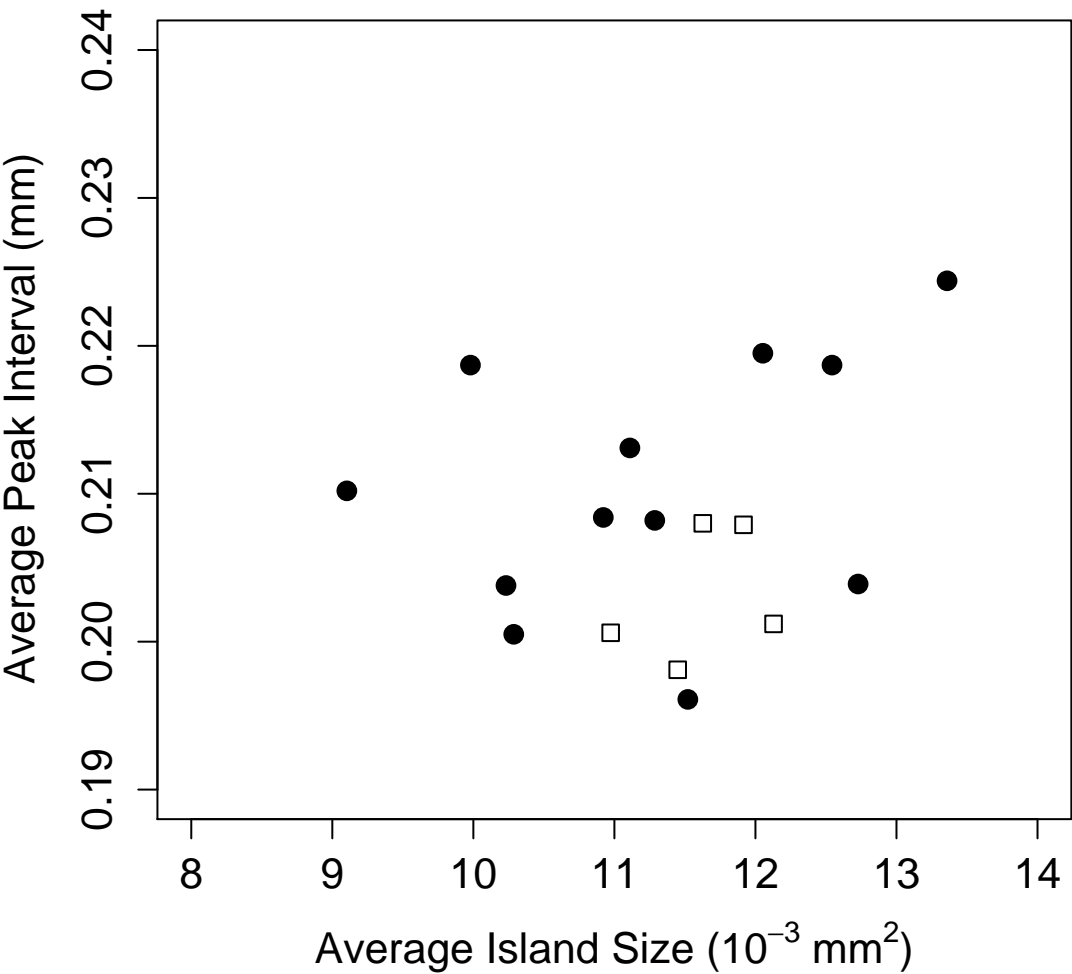

Supplement: pcbi.0030076.sg002.pdf [file pcbi.0030076.sg002.pdf]
